# Supplementary material for: Dynamic body acceleration as a proxy to predict the cost of locomotion in bottlenose dolphins
Source: Oxford University Press journal article supplement (doi:10.1242/jeb.243121), 2022-01-11
Supplement: jeb243121supp.pdf [file jeb243121supp.pdf]

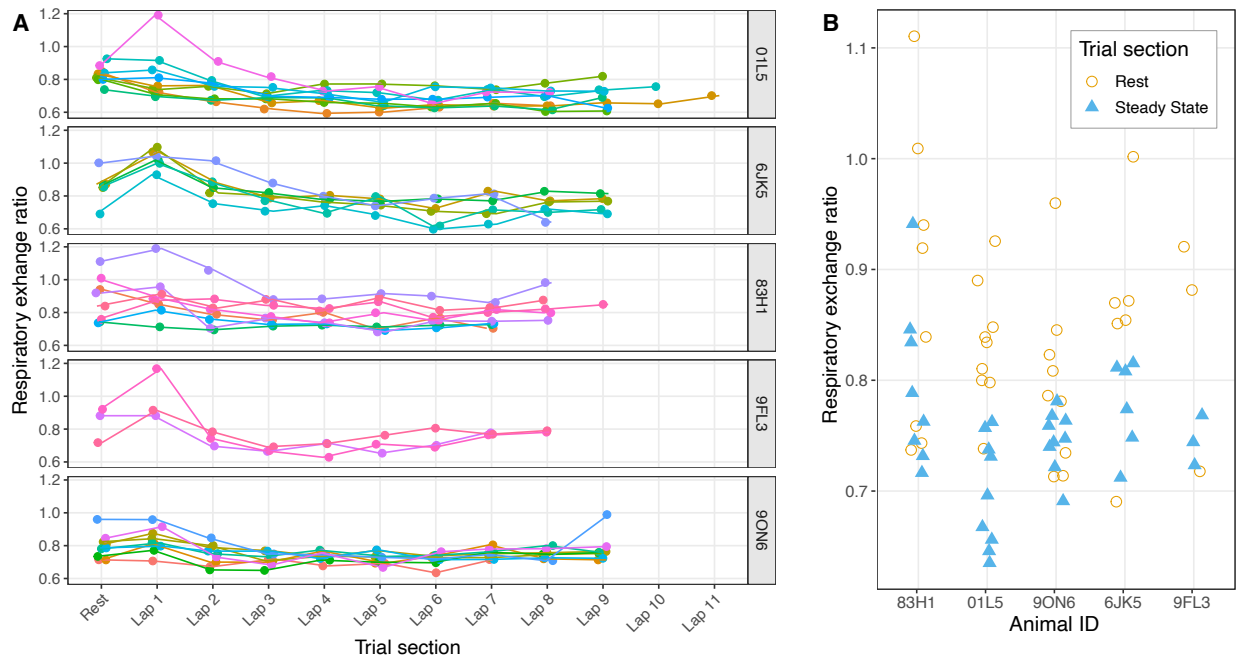

**Fig. S1. Respiratory exchange ratio (RER;  $V_{CO_2} V_{O_2}^{-1}$ ).** RER for five dolphins during 35 trials. A) Mean RER per rest or per lap; each line represents one trial. B) Points represent mean RER during rest or during steady-state periods.
